# Supplementary material for: Mind the Gap: Developing an Integrated Behavioral Health Home to Address Health Disparities in Serious Mental Illness
Source: Atypon-hosted journal article supplement (doi:10.1176/appi.ps.201700063), 2017-08-01
Supplement: appi.ps.201700063.ds001.pdf [file appi.ps.201700063.ds001.pdf]

 


Psychiatry Online
