# Supplementary material for: Mind the Gap: Developing an Integrated Behavioral Health Home to Address Health Disparities in Serious Mental Illness
Source: Atypon-hosted journal article supplement (doi:10.1176/appi.ps.201700063), 2017-08-01
Supplement: appi.ps.201700063.ds001.pdf [file appi.ps.201700063.ds001.pdf]

**Appendix Table 1. Baseline Characteristics of BHH Intervention and non-BHH Patients Before Propensity Score Adjustment – By Diagnosis**

| <b>Variable</b>                            | <b>All Control<br/>Patients<br/>n=1521</b> | <b>All BHH<br/>Patients<br/>n=424</b> | <b>Schizophrenia<br/>Controls<br/>n=962</b> | <b>Schizophrenia<br/>BHH<br/>n=369</b> | <b>Bipolar<br/>Controls<br/>n=559</b> | <b>Bipolar<br/>BHH<br/>n=55</b> |
|--------------------------------------------|--------------------------------------------|---------------------------------------|---------------------------------------------|----------------------------------------|---------------------------------------|---------------------------------|
| Female                                     | 51.35                                      | 46.70                                 | 47.92                                       | 46.07                                  | 57.25                                 | 50.91                           |
| Age                                        | 50.19                                      | 48.41                                 | 51.80                                       | 48.65                                  | 47.43                                 | 46.80                           |
| <b>Race/Ethnicity</b>                      |                                            |                                       |                                             |                                        |                                       |                                 |
| White Non-Hispanic                         | 59.11                                      | 64.15                                 | 53.53                                       | 63.69                                  | 68.69                                 | 67.27                           |
| Black                                      | 18.41                                      | 22.17                                 | 23.08                                       | 22.22                                  | 10.38                                 | 21.82                           |
| Hispanic                                   | 8.42                                       | 2.12                                  | 9.46                                        | 2.17                                   | 6.62                                  | 1.82                            |
| Asian                                      | 1.97                                       | 2.12                                  | 2.49                                        | 2.17                                   | 1.07                                  | 1.82                            |
| Non-English Speaker                        | 20.84                                      | 10.61                                 | 24.53                                       | 11.38                                  | 14.49                                 | 5.45                            |
| Medicare                                   | 48.72                                      | 56.60                                 | 53.43                                       | 58.54                                  | 40.61                                 | 43.64                           |
| Medicaid                                   | 33.00                                      | 32.78                                 | 33.37                                       | 32.25                                  | 32.38                                 | 36.36                           |
| Private Insurance                          | 70.61                                      | 70.75                                 | 70.79                                       | 71.27                                  | 70.30                                 | 67.27                           |
| Uninsured                                  | 1.12                                       | 0.71                                  | 0.62                                        | 0.27                                   | 1.97                                  | 3.64                            |
| % Female Head of Household (CBG)           | 21.36                                      | 22.46                                 | 21.54                                       | 22.45                                  | 21.05                                 | 22.48                           |
| % Foreign Born (CBG)                       | 29.76                                      | 28.90                                 | 30.19                                       | 28.62                                  | 29.01                                 | 30.79                           |
| % Living <FPL (CBG)                        | 11.27                                      | 12.27                                 | 11.17                                       | 12.13                                  | 11.46                                 | 13.19                           |
| % Less than High School Grad (CBG)         | 13.96                                      | 11.82                                 | 14.33                                       | 11.76                                  | 13.32                                 | 12.21                           |
| Diabetes                                   | 15.78                                      | 10.14                                 | 19.02                                       | 10.30                                  | 10.20                                 | 9.09                            |
| Bipolar Disorder                           | 36.75                                      | 12.97                                 | 0.00                                        | 0.00                                   | 100.00                                | 100.00                          |
| Hypertension                               | 33.00                                      | 25.94                                 | 35.03                                       | 26.02                                  | 29.52                                 | 25.45                           |
| LDL Level                                  | 106.33                                     | 113.86                                | 104.80                                      | 112.75                                 | 109.30                                | 119.72                          |
| HbA1c%                                     | 6.27                                       | 5.91                                  | 6.32                                        | 5.91                                   | 6.17                                  | 5.93                            |
| Fasting Glucose                            | 121.20                                     | 113.21                                | 125.45                                      | 122.48                                 | 113.46                                | 109.03                          |
| Current Smoker                             | 30.97                                      | 32.08                                 | 29.63                                       | 31.98                                  | 33.27                                 | 32.73                           |
| Pre Period ED Use (%)                      | 40.43                                      | 38.21                                 | 38.05                                       | 37.40                                  | 44.54                                 | 43.64                           |
| Pre Period Psychiatric Hospitalization (%) | 8.15                                       | 12.03                                 | 9.77                                        | 12.20                                  | 5.37                                  | 10.91                           |
| Pre Period Medical Hospitalizations (%)    | 20.78                                      | 17.45                                 | 22.14                                       | 17.89                                  | 18.43                                 | 14.55                           |
| Pre Period Glucose Screen (%)              | 69.17                                      | 64.62                                 | 70.58                                       | 63.69                                  | 66.73                                 | 70.91                           |
| Pre Period HbA1c Screen (%)                | 42.01                                      | 49.29                                 | 45.11                                       | 47.97                                  | 36.67                                 | 58.18                           |
| Pre Period LDL screen (%)                  | 41.75                                      | 47.64                                 | 43.66                                       | 46.07                                  | 38.46                                 | 58.18                           |

**Appendix Table 2. Pre-Post Differences in Health Measures and Lab Results for BHH and non-BHH Patients with Propensity Score Weighting (Diabetes Patients Only)**

| Variable              | (contrast)<br>(BHH <sub>Post</sub> – Control <sub>Post</sub> ) –<br>(BHH <sub>Pre</sub> – Control <sub>Pre</sub> ) | Delta SE | p-value | *<.10;<br>**<0.05 |
|-----------------------|--------------------------------------------------------------------------------------------------------------------|----------|---------|-------------------|
| LDL levels            | 8.016                                                                                                              | 6.203    | .196    |                   |
| Hemoglobin A1c levels | .202                                                                                                               | .300     | .500    |                   |
| Glucose levels        | -6.937                                                                                                             | 16.512   | .674    |                   |

**Appendix Table 3 - Pre Post Differences for BHH and non-BHH Patients by Diagnosis Group**

| Variable                                         | Schizophrenia                                                     |          |                 | Bipolar                                                        |          |         |
|--------------------------------------------------|-------------------------------------------------------------------|----------|-----------------|----------------------------------------------------------------|----------|---------|
|                                                  | Contrast<br>(BHHPost –<br>ControlPost) - (BHHPre<br>– ControlPre) | Delta SE | p-value         | Contrast<br>(BHHPost – ControlPost)<br>- (BHHPre – ControlPre) | Delta SE | p-value |
| <b><u>Service Utilization</u></b>                |                                                                   |          |                 |                                                                |          |         |
| % Patients with any ED Use                       | .016                                                              | .036     | .651            | -.012                                                          | .085     | .886    |
| Total ED                                         | -.492                                                             | .197     | <b>.012</b>     | -.062                                                          | .259     | .809    |
| Num ED Visits (given any ED)                     | -.696                                                             | .234     | <b>.003</b>     | N/A                                                            | N/A      | N/A     |
| % Patients with Any Psychiatric Hospitalizations | -.030                                                             | .023     | .192            | .021                                                           | .050     | .668    |
| Total Psychiatric Hospitalizations               | -.134                                                             | .044     | <b>.002</b>     | .009                                                           | .089     | .924    |
| Number Psychiatric Hospitalizations (given any)  | -.735                                                             | .205     | <b>&lt;.001</b> | N/A                                                            | N/A      | N/A     |
| % Patients with Any Medical Hospitalizations     | -.005                                                             | .027     | .847            | -.012                                                          | .068     | .861    |
| Number Medical Hospitalizations (given any)      | -.317                                                             | .186     | .087            | -.026                                                          | .137     | .847    |
| Total Medical Hospitalizations                   | -.076                                                             | .054     | .164            | N/A                                                            | N/A      | N/A     |
| <b><u>Screenings</u></b>                         |                                                                   |          |                 |                                                                |          |         |
| LDL Test                                         | .078                                                              | .042     | .064            | .035                                                           | .087     | .684    |
| HbA1c Test                                       | .083                                                              | .041     | <b>.042</b>     | .086                                                           | .080     | .286    |
| Glucose Test                                     | .019                                                              | .037     | .620            | -.004                                                          | .083     | .959    |
| Either HbA1c or Glucose                          | .052                                                              | .034     | .130            | .048                                                           | .069     | .485    |
| <b><u>Lab Results</u></b>                        |                                                                   |          |                 |                                                                |          |         |
| LDL Levels                                       | -4.094                                                            | 3.695    | .268            | N/A                                                            | N/A      | N/A     |
| Hemoglobin A1c Levels                            | .052                                                              | .085     | .538            | N/A                                                            | N/A      | N/A     |
| Glucose Levels                                   | 4.028                                                             | 3.158    | .202            | N/A                                                            | N/A      | N/A     |

Notes: N/A is displayed in areas where sample sizes were too small to calculate difference-in-difference results.

**Appendix Table 4. Pre-Post Differences for Service Utilization for BHH and non-BHH Patients with Propensity Score Weighting – Including Primary Care Visit in Propensity Score**

| Variable                                            | Contrast<br>(BHH <sub>Post</sub> – Control <sub>Post</sub> ) -<br>(BHH <sub>Pre</sub> – Control <sub>Pre</sub> ) | Delta SE | p-value     | *<.10;<br>**<.05 |
|-----------------------------------------------------|------------------------------------------------------------------------------------------------------------------|----------|-------------|------------------|
| <i>Service Utilization</i>                          |                                                                                                                  |          |             |                  |
| % Patients with Any ED Use                          | .014                                                                                                             | .033     | .678        |                  |
| Total ED visits                                     | -.391                                                                                                            | .178     | <b>.029</b> | **               |
| Num. ED visits (excluding zeros)                    | -.587                                                                                                            | .222     | <b>.008</b> | **               |
| % Patients with any psychiatric hospitalizations    | -.030                                                                                                            | .021     | .146        |                  |
| Total psychiatric hospitalizations                  | -.128                                                                                                            | .040     | <b>.002</b> |                  |
| Num. psychiatric hospitalizations (excluding zeros) | -.666                                                                                                            | .211     | <b>.002</b> | **               |
| % Patients with any medical hospitalizations        | .002                                                                                                             | .025     | .941        |                  |
| Total medical hospitalizations                      | -.057                                                                                                            | .052     | .265        |                  |
| Num. medical hospitalizations (excluding zeros)     | -.314                                                                                                            | .180     | .081        | *                |
| <i>Screenings</i>                                   |                                                                                                                  |          |             |                  |
| LDL test                                            | .082                                                                                                             | .039     | <b>.035</b> | **               |
| HbA1c test                                          | .087                                                                                                             | .037     | <b>.019</b> | **               |
| Glucose Test                                        | .021                                                                                                             | .034     | .544        |                  |
| Either HbA1c or Glucose                             | .055                                                                                                             | .031     | <b>.075</b> | *                |
| <i>Lab Results</i>                                  |                                                                                                                  |          |             |                  |
| LDL level                                           | -4.328                                                                                                           | 3.298    | .190        |                  |
| HbA1c level                                         | .049                                                                                                             | .079     | .538        |                  |
| Glucose level                                       | 2.930                                                                                                            | 2.899    | .312        |                  |
| <i>Lab Results – Diabetes Patients Only</i>         |                                                                                                                  |          |             |                  |
| LDL level                                           | 7.852                                                                                                            | 6.195    | .205        |                  |
| HbA1c level                                         | .224                                                                                                             | .303     | .461        |                  |
| Glucose level                                       | -7.117                                                                                                           | 16.712   | .670        |                  |

*Note.* BHH = Behavioral Health Home Program; PS = propensity score; HbA1c = Hemoglobin A1c; LDL = low density lipoprotein. Estimated using GEE models (Stata xtgee and margins commands; logit link for binary outcomes and log link and gamma family variance for continuous outcome measures). Models were adjusted for propensity score weights using the Stata svy command. Propensity scores included the following covariates: sex; age; race/ethnicity (non-Hispanic

White, non-Hispanic black, Asian, Hispanic); non-native English speaker; Medicare enrollment; Medicaid enrollment; diagnosis of diabetes or bipolar disorder; area-level variables (percent foreign-born, percent living below federal poverty level (FPL), percent with female head of household, percent less than high school graduate), any primary care visits in pre-intervention year.
